# Supplementary material for: Neurocognitive signatures of phonemic sequencing in expert backward speakers
Source: PubMed Central journal article supplement (PMC7326922; doi:10.1038/s41598-020-67551-z), 2020-06-30
Supplement: 41598_2020_67551_MOESM1_ESM.pdf [file 41598_2020_67551_MOESM1_ESM.pdf]

## Neurocognitive signatures of phonemic sequencing in expert backward speakers

María José Torres-Prioris<sup>1,2</sup>, Diana López-Barroso<sup>1,2</sup>, Estela Càmara<sup>3</sup>, Sol Fittipaldi<sup>4,5</sup>,  
Lucas Sedeño<sup>5</sup>, Agustín Ibáñez<sup>4,5,6,7,8</sup>, Marcelo L. Berthier<sup>1</sup>, Adolfo M. García<sup>4,5,8,9,10,\*</sup>

<sup>1</sup> Cognitive Neurology and Aphasia Unit, Centro de Investigaciones Médico-Sanitarias, Instituto de Investigación Biomédica de Málaga (IBIMA), University of Malaga, Malaga, Spain

<sup>2</sup> Area of Psychobiology, Faculty of Psychology and Speech Therapy, University of Malaga, Malaga, Spain

<sup>3</sup> Cognition and Brain Plasticity Unit, Bellvitge Biomedical Research Institute (IDIBELL), L'Hospitalet de Llobregat, Barcelona, Spain

<sup>4</sup> Universidad de San Andrés, Buenos Aires, Argentina

<sup>5</sup> National Scientific and Technical Research Council (CONICET), Buenos Aires, Argentina

<sup>6</sup> Universidad Autónoma del Caribe, Barranquilla, Colombia

<sup>7</sup> Center for Social and Cognitive Neuroscience (CSCN), School of Psychology, Universidad Adolfo Ibáñez, Santiago, Chile

<sup>8</sup> Global Brain Health Institute, University of California, San Francisco, United States

<sup>9</sup> Faculty of Education, National University of Cuyo (UNCuyo), Mendoza, Argentina

<sup>10</sup> Departamento de Lingüística y Literatura, Facultad de Humanidades, Universidad de Santiago de Chile, Santiago, Chile

\* **Corresponding author:** Adolfo M. García, Ph. D., Universidad de San Andrés and CONICET; Vito Dumas 284, B1644BID Victoria, Buenos Aires, Argentina; Phone: (54-11) 4725-7000. E-mail: [adolfoMartingarcia@gmail.com](mailto:adolfoMartingarcia@gmail.com)

## Supplementary information

### 1. Supplementary methods

#### 1.1. Behavioral assessment

**Operational span task.** In this task letters are used as to-be-remembered stimuli and math operations as distractors. In each trial, participants viewed a letter and then performed a calculation. This sequence was repeated in sets of three to seven trials, varying randomly across participants, with a total of 75 trials. After each set, subjects were presented with an extended list of letters and had to click on the correct ones in their order of appearance. After the recall screen, a feedback screen showed the number of correctly remembered letters and the percentage of correct calculations. Prior to the task, all subjects underwent a three-stage training phase (for details, see<sup>1</sup>. Also, during the math operation training, we calculated the mean time needed to solve the operations. If during testing subjects took more than the mean time plus 2.5 *SDs*, that trial was computed as a speed error. Scores were calculated by summing the number of letters recorded correctly and in the right order (number of correct responses) and summing up the number of mistakes in math operations (speed and accuracy), named math errors. Only subjects with a performance of 85% or higher in the math operations entered the analysis<sup>2</sup>.

**Symmetry span task:** This test resembles the operational span task, with some differences. First, instead of letters, participants are presented with a four-by-four matrix in which different to-be remembered locations are signaled. The number of locations varied from two to five in each set, with a total of 42 trials. Second, instead of performing math operations, subjects had to judge whether a figure was symmetrical in its vertical axis or not. To this end, participants were shown sequences of spatial locations in the matrix, followed by a figure to judge its symmetry; this was followed by the testing phase. As in the operational span task, feedback was offered concerning the number of correct locations remembered and the percentage of correct answers in the symmetry judgement phase. Before testing, all participants completed three practice blocks allowing for familiarization with all phases of the task. Two scores were calculated, namely: the number of correct positions and of symmetry errors. The former was obtained by summing up the number of locations remembered correctly and in the right presentation order; the latter was established by adding the number of accuracy and speed errors committed in the symmetry judgment trials. The criterion to determine speed errors was the same as that used for the operation span task but based on the time employed in the symmetry judgment trials.

#### 1.2. Stimuli

##### 1.2.1. Forward word and pseudoword repetition task

| Words forward ( $n = 40$ ) |               |                     |               |
|----------------------------|---------------|---------------------|---------------|
| High-frequency words       |               | Low-frequency words |               |
| 1-2 syllables              | 3-6 syllables | 1-2 syllables       | 3-6 syllables |
| Noche                      | conferencia   | peine               | mochila       |
| Sala                       | instituto     | pipa                | sátira        |
| Llama                      | ejecución     | soñar               | manipular     |
| Juez                       | médico        | cubo                | deducir       |
| monte                      | guitarra      | clavo               | concordia     |
| avión                      | capacidad     | sobra               | ardilla       |
| junta                      | inversión     | truco               | coyote        |
| pleno                      | información   | pala                | abeja         |
| presión                    | octubre       | pliego              | conejo        |
| patria                     | constitución  | dogma               | demora        |

| Pseudowords ( $n = 40$ ) |         |            |              |                         |          |            |              |
|--------------------------|---------|------------|--------------|-------------------------|----------|------------|--------------|
| High-frequency syllables |         |            |              | Low-frequency syllables |          |            |              |
| 2 syll.                  | 3 syll. | 4 syll.    | 5 syll.      | 2 syll.                 | 3 syll.  | 4 syll.    | 5 syll.      |
| ena                      | conamo  | entosame   | terablenicia | olu                     | burrefo  | ustiñoie   | neciglotadia |
| cote                     | paesma  | deteraco   | cosimenlada  | chegue                  | geoncu   | denomugue  | cosumanfora  |
| esmo                     | asope   | pacósená   | indetomapo   | osfu                    | irrolo   | marópeno   | anquibesido  |
| saén                     | taensi  | menciabiso | analícato    | riol                    | muñeas   | tundialaso | Onotánego    |
| decón                    | brénodi | autidenes  | masperamones | bupil                   | plúzogue | augicumal  | cusmipalates |

### 1.2.2. Backward word and pseudoword repetition task

| Words forward ( $n = 40$ )  |                         |                     |                           |
|-----------------------------|-------------------------|---------------------|---------------------------|
| High-frequency words        |                         | Low-frequency words |                           |
| 2 syllables                 | 3-5 syllables           | 2 syllables         | 3-5 syllables             |
| amor                        | Solidaridad             | blusa               | apoyarse                  |
| fecha                       | Argentina               | pera                | pereza                    |
| cuba                        | Hospital                | fiera               | carruaje                  |
| hotel                       | Hermano                 | ansia               | cortina                   |
| pagar                       | Protección              | sentar              | amargura                  |
| acto                        | Existencia              | trueno              | escoba                    |
| carta                       | Desarrollar             | maldad              | tortilla                  |
| curso                       | Comisario               | ciervo              | bailarín                  |
| nación                      | Ministerio              | limbo               | martillo                  |
| vigor                       | Respiración             | pulso               | modernidad                |
| Words backward ( $n = 40$ ) |                         |                     |                           |
| achul (lucha)               | nóisivelet (televisión) | kilo (olik)         | zedarnoh (honradez)       |
| efej (jefe)                 | nóicisopxe (exposición) | ebleum (mueble)     | sateirotsih (historietas) |
| reac (caer)                 | ainoloc (colonia)       | opas (sapo)         | olugnátcer (rectángulo)   |
| arim (mira)                 | olucríc (círculo)       | ralloc (collar)     | adalsne (ensalada)        |
| rirba (abrir)               | nóisaerc (creación)     | nótob (botón)       | agutrot (tortuga)         |
| nóinu (unión)               | akígól (lógica)         | atnam (manta)       | anaznam (manzana)         |
| evalc (clave)               | otisóporp (propósito)   | azat (taza)         | ogolónom (monólogo)       |
| eplog (golpe)               | ovituceje (ejecutivo)   | zeun (nuez)         | orenillag (gallinero)     |
| agrac (carga)               | orejnartxe (extranjero) | oidet (tedio)       | dadineres (serenidad)     |
| apluc (culpa)               | ojobart (trabajo)       | resoc (coser)       | aimedipe (epidemia)       |

| pseudowords ( $n = 40$ ) |           |             |                |                         |           |              |                |
|--------------------------|-----------|-------------|----------------|-------------------------|-----------|--------------|----------------|
| high-frequency syllables |           |             |                | low-frequency syllables |           |              |                |
| 2 syll.                  | 3 syll.   | 4 syll.     | 5 syll.        | 2 syll.                 | 3 syll.   | 4 syll.      | 5 syll.        |
| mengo                    | diconcias | bacompiter  | padestamendos  | dentu                   | rijundios | fubelporón   | dolirtagentas  |
| bledos                   | meterción | atelación   | senociaresca   | clegas                  | gosandión | acichesión   | fomosiarinda   |
| pronda                   | camendo   | grancodesta | aidespeconte   | blismu                  | putelcho  | prantecolde  | aicaldisempa   |
| baisa                    | prestona  | perlitebles | elestramienda  | zaiña                   | plasquice | yerguimeblos | esontrafielda  |
| Miendo                   | puesticón | maprósedas  | prodalesciones | quieslo                 | luesbicán | mafrínegas   | cletufansiolas |

### 1.2.3. Forward and backward sentence repetition

#### List 1

1. Iba andando y cayó
2. Estará lunes y martes
3. Abren escuelas y hospitales
4. Sabe leer y escribir
5. Colgar carteles y avisos
6. Hoy he comido pollo y papas
7. Lo operaron y se recuperó rápido
8. Las opciones parecen buenas y acertadas
9. Multan por alta velocidad y drogas
10. La lectura es gratificante y divertida
11. Aprobé todos los exámenes y pasé de año
12. En esta zona llueve en invierno y verano
13. Ha llegado esta mañana y regresa el sábado
14. Me podría haber llamado y no lo hizo
15. Presenta una obra apta para chicos y grandes
16. Pronto cumple cincuenta años y lo festejará a lo grande
17. La selección de películas incluye algunas clásicas y otras modernas
18. Las computadoras se usan para resolver problemas y para entretenerse.
19. Encima de mi escritorio está la carta y el sello
20. Pedile a la vecina un poco de leche y chocolate
21. Hubo varios heridos en un accidente y llamaron a la ambulancia
22. Son características típicas de los monos y de los humanos inteligentes
23. El ejercicio físico mejora la salud y el estado de ánimo general
24. El auto que me he comprado lleva termómetro y equipo de música
25. El cerebro controla funciones vitales y permite responder a estímulos externos

#### List 2

1. Inventar letras y cantar
2. Es atento y gracioso
3. Luna llena y playa
4. Apagamos y nos vamos
5. Cosas locas y aburridas
6. El escarabajo azul y la tortuga
7. Suena el teléfono y enseguida aparece
8. Esperando su paquete y el cambio
9. Su trabajo exige esfuerzo y paciencia
10. Hay empanadas al horno y canelones
11. Canciones que te traen recuerdos y te alegran
12. Me pidió permiso para salir y se fue
13. Mafalda es una niña muy inteligente y ocurrente
14. El universo está formado por planetas y estrellas
15. El abogado sabe mucho de leyes y sentencias
16. El libro es ameno y cambiará tu forma de pensar
17. Es una idea genial y seguro que lo podés conseguir
18. Cuando era joven jugaba al trompo y a las bolillas
19. Pronto cumplirá su promesa y estaremos todos listos para festejar
20. Los avances tecnológicos han impulsado la industria y la comunicación
21. Los animales característicos de la sabana son la jirafa y el león
22. Las aves revolotean entre los presentes y se posan en las estatuas
23. El taxi paró tres cuadras después y todos bajaron de prisa
24. Todas las semanas salgo a correr y a andar en bicicleta
25. El departamento tiene cuatro habitaciones arriba y un patio amplio abajo

### 1.2.4. Lexical decision

| Words ( <i>n</i> = 48) |             |            |        | Pseudowords ( <i>n</i> = 48) |             |            |        |
|------------------------|-------------|------------|--------|------------------------------|-------------|------------|--------|
| roca                   | teléfono    | Gorriones  | jarra  | racu                         | tolófena    | garriones  | jurro  |
| subir                  | teniente    | Lechuga    | morder | sibor                        | taneinto    | lichuzo    | murdor |
| guión                  | imaginación | Cerrojo    | moño   | goeún                        | imigenución | cerrrujo   | muña   |
| Tela                   | solitario   | zanahoria  | loba   | tile                         | sulitereo   | zapatoria  | lubo   |
| pierna                 | fotografía  | gaseosa    | fresa  | poerno                       | futogrefía  | gesiosa    | fruso  |
| vaca                   | espejo      | Paella     | jarrón | vocu                         | Espaje      | puello     | jorrán |
| guardia                | ceremonia   | Chorizo    | clavel | gaurdio                      | cirumonea   | churoza    | cleva  |
| regla                  | sabiduría   | Butaca     | barman | rugle                        | sabudaría   | botuca     | bermon |
| sal                    | esfera      | bromear    | cartón | sil                          | esforo      | brumeor    | cartán |
| juicio                 | Anillo      | amabilidad | aula   | joiceo                       | anulla      | amobiludad | aola   |
| cantar                 | médica      | Anotar     | hacha  | contur                       | Mídeco      | anuter     | hucho  |
| viaje                  | esquina     | Arruga     | uña    | veaja                        | esqueno     | arragu     | eña    |

### 2.3. Neuroimaging data acquisition

Tractographic analyses were made with a control sample of 18 participants. This subsample was matched with both backward speakers in terms of age (Backward speaker 1: Crawford's *t*, two-tailed = .603; *p* = .554; Backward speaker 2: Crawford's *t*, two-tailed = 1.025; *p* = .319) and years of education (Backward speaker 1: Crawford's *t*, two-tailed = .926; *p* = .367; Backward speaker 2: Crawford's *t*, two-tailed = 0.00; *p* = 1).

Resting-state functional connectivity analyses included a control sample of 15 participants, who were also matched with both backward speakers in terms of age (Backward speaker 1: Crawford's *t*, two-tailed = .476; *p* = .641; Backward speaker 2: Crawford's *t*, two-tailed = .875; *p* = .396) and years of education (Backward speaker 1: Crawford's *t*, two-tailed = .602; *p* = .556; Backward speaker 2: Crawford's *t*, two-tailed = -.303; *p* = .767).

## 2. Supplementary results

**Table S1.** Performance of the two backward speakers and the control group in cognitive tests.

| Task ( <i>n</i> )        | Controls<br>(mean and <i>SD</i> ) | BS1 | BS2 | Statistical comparison |          |            |               |                  |          |            |                |
|--------------------------|-----------------------------------|-----|-----|------------------------|----------|------------|---------------|------------------|----------|------------|----------------|
|                          |                                   |     |     | BS1 vs. controls       |          |            |               | BS2 vs. controls |          |            |                |
|                          |                                   |     |     | <i>t</i>               | <i>p</i> | <i>zCC</i> | CI            | <i>t</i>         | <i>P</i> | <i>zCC</i> | CI             |
| Matrix reasoning (18)    | 13.33 (1.81)                      | 14  | 10  | .360                   | .723     | .370       | -.113 to .843 | -1.79            | .091     | -1.84      | -2.59 to -1.06 |
| Forward digit span (18)  | 8.61 (1.54)                       | 16* | 8   | 4.67                   | < .001   | 4.79       | 3.13 to 6.45  | -.386            | .704     | -.396      | -.871 to .090  |
| Backward digit span (18) | 8.28 (2.05)                       | 12  | 8   | 1.76                   | .095     | 1.81       | 1.04 to 2.56  | -.133            | .895     | -.137      | -.599 to .330  |
| Operational span (15)    |                                   |     |     |                        |          |            |               |                  |          |            |                |
| Total number correct     | 50.93 (10.41)                     | 55  | 11* | .379                   | .710     | .391       | -.141 to .911 | -3.71            | .002     | -3.83      | -5.32 to -2.33 |
| Math error s             | 6.27 (3.33)                       | 8   | 3   | .503                   | .622     | .520       | -.029 to 1.05 | -.951            | .357     | -.982      | -1.59 to -.349 |
| Symmetry span (17)       |                                   |     |     |                        |          |            |               |                  |          |            |                |
| Total number correct     | 27.59 (6.81)                      | 32  | 10* | .629                   | .538     | .648       | .114 to 1.16  | -2.51            | .023     | -2.58      | -3.58 to -1.56 |
| Symmetry errors          | 2.47 (1.46)                       | 2   | 4   | .313                   | .758     | .322       | -.805 to .171 | 1.01             | .323     | 1.04       | .441 to 1.63   |

*n*: number of subjects included after removal of outliers and/or data from subjects with a performance below 85% (for the operational and symmetry span tasks). BS1: Backward speaker 1; BS2: Backward speaker 2. Statistical comparisons are based on two-tailed Crawford's *t*-tests<sup>3,4</sup>. Asterisks (\*) indicate significant differences at  $p < .05$ .

**Table S2.** Accuracy of the two backward speakers and the control group in the performance of four repetition tasks.

| Repetition direction                                       | Stimulus type<br>(dependent measure)<br>[ <i>n</i> = 18] | Controls<br>(mean and <i>SD</i> ) | BS1  | BS2  | Statistical comparison |          |            |                |                  |          |            |                |
|------------------------------------------------------------|----------------------------------------------------------|-----------------------------------|------|------|------------------------|----------|------------|----------------|------------------|----------|------------|----------------|
|                                                            |                                                          |                                   |      |      | BS1 vs. controls       |          |            |                | BS2 vs. controls |          |            |                |
|                                                            |                                                          |                                   |      |      | <i>t</i>               | <i>P</i> | <i>zCC</i> | CI             | <i>t</i>         | <i>p</i> | <i>zCC</i> | CI             |
| <i>Forward and backward word and pseudoword repetition</i> |                                                          |                                   |      |      |                        |          |            |                |                  |          |            |                |
| Forward                                                    | Words                                                    | .95 (.04)                         | .95  | .97  | .000                   | 1        | .000       | -.462 to .462  | .487             | .632     | .500       | .002 to .985   |
|                                                            | Pseudowords                                              | .77 (.109)                        | .87  | .77  | .893                   | .384     | .917       | .354 to 1.46   | .000             | 1        | .000       | -.462 to .462  |
| Backward                                                   | Words forward                                            | .21 (.133)                        | .92* | 1*   | 5.19                   | < .001   | 5.33       | 3.49 to 7.16   | 5.78             | < .001   | 5.94       | 3.90 to 7.96   |
|                                                            | Words backward                                           | .13 (.112)                        | .79* | .69* | 5.73                   | < .001   | 5.89       | 3.87 to 7.90   | 4.87             | < .001   | 5.00       | 3.26 to 6.72   |
|                                                            | Pseudowords                                              | .030 (.039)                       | .66* | .49* | 15.72                  | < .001   | 16.15      | 10.75 to 21.54 | 11.48            | < .001   | 11.79      | 7.83 to 15.74  |
| <i>Forward and backward sentence repetition</i>            |                                                          |                                   |      |      |                        |          |            |                |                  |          |            |                |
| Forward                                                    | Sentences                                                | .90 (.088)                        | .88  | .92  | -.221                  | .827     | -.227      | -.692 to .244  | .221             | .827     | .227       | -.244 to .692  |
| Backward                                                   | Sentences                                                | .00 (.01)                         | .88* | .56* | 65.58                  | < .001   | 67.38      | 44.94 to 89.80 | 41.63            | < .001   | 42.76      | 28.25 to 57.00 |

acc: accuracy. BS1: Backward speaker 1; BS2: Backward speaker 2. Statistical comparison were performed through two-tailed Crawford's *t*-tests<sup>3,4</sup>. Asterisks (\*) indicate significant differences at  $p < .05$ .

**Table S3.** Accuracy for the two backward subjects in the backward repetition tasks.

|                           | BS1        | BS2        |
|---------------------------|------------|------------|
| Single items <sup>1</sup> |            |            |
| 1-word forward            | .92        | 1          |
| 1-word backward           | .77        | .67        |
| 1-pseudoword              | .67        | .50        |
| <b>Mean all items</b>     | <b>.79</b> | <b>.72</b> |
| Sentences                 |            |            |
| 4-6 words                 | 1          | .90        |
| 10-12 words               | .70        | .30        |
| <b>Mean all items</b>     | <b>.88</b> | <b>.56</b> |

<sup>1</sup>This task required backward repetition of words presented in forward position (prototypical form), words presented in backward order, and pseudowords. BS1: Backward speaker 1; BS2: Backward speaker 2.

**Table S4.** Comparison of the two backward speakers with controls in backward tasks, controlling for memory outcomes.

|                                              | Statistical comparison <sup>1</sup> |                           |                  |          |                           |                  |
|----------------------------------------------|-------------------------------------|---------------------------|------------------|----------|---------------------------|------------------|
|                                              | <i>p</i>                            | BS1 vs. controls<br>zCCC* | CI               | <i>p</i> | BS2 vs. controls<br>zCCC* | CI               |
| Backward repetition of words and pseudowords | < .001                              | 7.946                     | 3.250 to 10.533  | .001     | 7.153                     | 2.993 to 9.410   |
| Backward repetition of sentences             | < .001                              | 67.876                    | 36.674 to 82.031 | < .001   | 43.070                    | 23.177 to 52.111 |

<sup>1</sup>Bayesian comparison developed to compare a single case's score to that of a control group while controlling for covariates<sup>5</sup>. The *BTD\_Cov.ex* software was used. BS1: Backward speaker 1; BS2: Backward speaker 2. (\*) effect size.



**Table S5.** Performance of the two backward subjects and the control group in the lexical decision task.

| Stimulus type<br>and dependent measure<br>( <i>n</i> = 17) | Controls<br>(mean and <i>SD</i> ) | BS1   | BS2  | Statistical comparison |          |            |                |                  |          |            |                |
|------------------------------------------------------------|-----------------------------------|-------|------|------------------------|----------|------------|----------------|------------------|----------|------------|----------------|
|                                                            |                                   |       |      | BS1 vs. controls       |          |            |                | BS2 vs. controls |          |            |                |
|                                                            |                                   |       |      | <i>t</i>               | <i>p</i> | <i>zCC</i> | CI             | <i>T</i>         | <i>p</i> | <i>zCC</i> | CI             |
| Global accuracy                                            | .79 (.08)                         | .95   | .85  | 1.94                   | .069     | 2.00       | 1.15 to 2.82   | .729             | .476     | .750       | .200 to 1.28   |
| Global RT                                                  | 1.44 (.257)                       | .920  | 1.12 | -1.98                  | .064     | -2.04      | -2.88 to -1.18 | -1.199           | .248     | -1.23      | -1.86 to -.586 |
| Forward word accuracy                                      | .97 (.036)                        | .92   | 1    | -1.35                  | .195     | -1.38      | -2.05 to -.705 | .810             | .429     | .833       | .269 to 1.37   |
| Forward word RT                                            | .969 (.179)                       | .742  | .772 | -1.23                  | .235     | -1.26      | -1.90 to -.613 | -1.07            | .300     | -1.10      | -1.69 to -.483 |
| Backward word accuracy                                     | .68 (.127)                        | .92   | .71  | 1.83                   | .084     | 1.89       | 1.07 to 2.68   | .230             | .821     | .236       | -.250 to .715  |
| Backward word RT                                           | 1.55 (.222)                       | .939* | 1.35 | -2.67                  | .016     | -2.75      | -3.80 to -1.68 | -.880            | .391     | -.905      | -1.46 to -.327 |
| Pseudoword accuracy                                        | .75 (.128)                        | .98   | .85  | 1.74                   | .099     | 1.79       | 1.00 to 2.56   | .759             | .458     | .781       | .226 to 1.31   |
| Pseudoword RT                                              | 1.73 (.335)                       | .997* | 1.24 | -2.13                  | .048     | -2.20      | -3.08 to -1.29 | -1.42            | .174     | -1.45      | -2.13 to -.754 |

RT: response time in seconds. BS1: Backward speaker 1; BS2: Backward speaker 2. Statistical comparison were performed via Crawford's two-tailed *t*-tests<sup>3,4</sup>. The asterisks (\*) indicate significant differences at  $p < .05$ .

**Table S6.** Voxel-based morphometry (VBM) results for Backward speaker 1. Results are reported at  $p < .001$ , uncorrected, with a minimum threshold extent of 50 voxels.

| Cluster size | Peak MNI coordinates |          |          | Hemisphere | Anatomical label<br>( <i>n</i> of voxels) | Peak <i>t</i> |
|--------------|----------------------|----------|----------|------------|-------------------------------------------|---------------|
|              | <i>x</i>             | <i>y</i> | <i>z</i> |            |                                           |               |
| <b>61</b>    | -34.5                | -40.5    | -7.5     | Left       | Parahippocampal (45)<br>Fusiform (12)     | 4.93          |

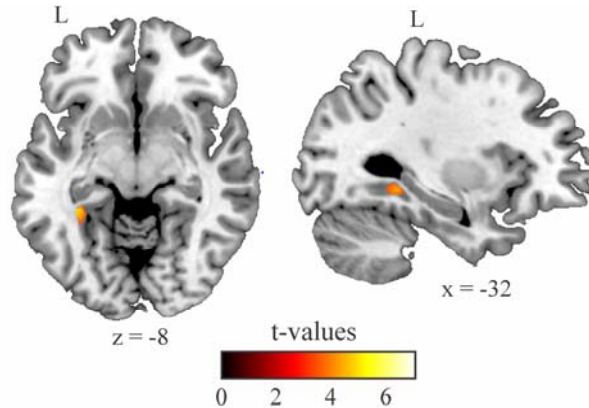

**Figure S1.** Voxel-based morphometry (VBM) results. Based on an uncorrected threshold of  $p < .001$ , with a minimum threshold extent of 50 voxels, Backward speaker 1 showed significantly greater grey matter volume (red-yellow colors) than controls in a cluster over the boundary between the left parahippocampal cortex and the fusiform gyrus. Images are shown in standard space over a MNI template available in MRICRON software.

**Table S7.** Voxel-based morphometry (VBM) results for Backward speaker 2.

| Cluster size                                                                                             | Peak MNI coordinates |          |          | Hemisphere | Anatomical label<br>( <i>n</i> of voxels)      | Peak <i>t</i> |
|----------------------------------------------------------------------------------------------------------|----------------------|----------|----------|------------|------------------------------------------------|---------------|
|                                                                                                          | <i>x</i>             | <i>y</i> | <i>z</i> |            |                                                |               |
| <b>Significant results at FDR-corrected, <math>p \leq .005</math></b>                                    |                      |          |          |            |                                                |               |
| <b>322</b>                                                                                               | 48                   | 33       | 12       | Right      | Inferior frontal (290)<br>Middle frontal (29)  | 15.9          |
| <b>124</b>                                                                                               | -37.5                | 46.5     | 13.5     | Left       | Middle frontal (115)<br>Inferior frontal (9)   | 9.07          |
| <b>66</b>                                                                                                | 4.5                  | -54      | 66       | Right      | Precuneus (65)                                 | 7.22          |
| <b>Significant results at uncorrected <math>p &lt; .001</math> (minimum extent threshold: 50 voxels)</b> |                      |          |          |            |                                                |               |
| <b>613</b>                                                                                               | 48                   | 33       | 12       | Right      | Inferior frontal (495)<br>Middle frontal (113) | 15.9          |
| <b>372</b>                                                                                               | -37.5                | 46.5     | 13.5     | Left       | Middle frontal (332)<br>Inferior frontal (40)  | 9.07          |
| <b>60</b>                                                                                                | 9                    | -87      | 19.5     | Right      | Cuneus (60)                                    | 5.07          |
| <b>51</b>                                                                                                | -33                  | 36       | 43.5     | Left       | Middle frontal (48)                            | 4.85          |
| <b>299</b>                                                                                               | 4.5                  | -54      | 66       | Right      | Precuneus (220)                                | 7.22          |
| <b>72</b>                                                                                                | 39                   | -45      | 63       | Right      | Postcentral (53)<br>Superior parietal (19)     | 5.18          |

**Table S8.** Nodes of mean diffusivity (MD) that significantly differed between Backward speaker 1 (BS1) and the control group. Only results that survived  $p < .05$  (FDR-corrected) at the node level are reported. For these nodes, differences in axial (AD) and radial diffusivity (RD) between BS1 and the control group are reported using a  $p < .05$  (FDR-corrected) in order to explore the underlying source of variability. Means ( $M$ ) and standard deviations ( $SD$ ) in MD are reported for the control group.

| Significant results at FDR-corrected $p \leq 0.05$ |                      |      |          |      |      |      |                |                |                |
|----------------------------------------------------|----------------------|------|----------|------|------|------|----------------|----------------|----------------|
| Hemisphere                                         | Tract                | Node | Controls |      | BS 1 | $t$  | $p$ (2-tailed) | AD             | RD             |
|                                                    |                      |      | $M$      | $SD$ |      |      |                | $p$ (2-tailed) | $p$ (2-tailed) |
| Left                                               | AF posterior segment | 95   | .76      | .036 | .89  | 3.47 | .048           | .466           | .200           |
|                                                    |                      | 96   | .76      | .034 | .90  | 3.96 | .020           | .466           | .164           |
|                                                    |                      | 97   | .76      | .033 | .91  | 4.26 | .013           | .466           | .134           |
|                                                    |                      | 98   | .76      | .033 | .91  | 4.37 | .013           | .466           | .134           |
|                                                    |                      | 99   | .77      | .033 | .91  | 4.44 | .013           | .466           | .134           |
|                                                    |                      | 100  | .77      | .032 | .91  | 4.50 | .013           | .466           | .134           |
| Right                                              | AF posterior segment | 1    | .75      | .178 | .88  | 4.10 | .013           | .993           | <b>.037</b>    |
|                                                    |                      | 2    | .75      | .178 | .88  | 4.36 | .010           | .993           | <b>.032</b>    |
|                                                    |                      | 3    | .74      | .178 | .89  | 4.52 | .010           | .993           | <b>.032</b>    |
|                                                    |                      | 4    | .74      | .178 | .88  | 4.63 | .010           | .993           | <b>.032</b>    |
|                                                    |                      | 5    | .74      | .177 | .88  | 4.56 | .010           | .993           | <b>.032</b>    |
|                                                    |                      | 6    | .74      | .176 | .86  | 4.27 | .010           | .993           | <b>.032</b>    |
|                                                    |                      | 7    | .74      | .175 | .84  | 3.85 | .018           | .993           | <b>.032</b>    |

AF: arcuate fasciculus. AD and RD nodes that significantly differed between backward speakers and controls ( $p < .05$ , FDR-corrected) are highlighted in bold.

**Table S9.** Nodes of mean diffusivity (MD) that significantly differed between Backward speaker 2 (BS2) and the control group. Only results that survived  $p < .05$  (FDR-corrected) at the node level are reported. For these nodes, differences in axial (AD) and radial diffusivity (RD) between BS2 and the control group are reported using a  $p < .05$  (FDR-corrected) in order to explore the underlying source of variability. Means ( $M$ ) and standard deviations ( $SD$ ) in MD are reported for the control group.

Significant results at FDR-corrected  $p \leq 0.05$

| Hemisphere | Tract                | Node | Controls |      | BS 2 | $t$         | $p$<br>(2-tailed) | AD<br>$p$ (2-tailed) | RD<br>$p$ (2-tailed) |
|------------|----------------------|------|----------|------|------|-------------|-------------------|----------------------|----------------------|
|            |                      |      | $M$      | $SD$ |      |             |                   |                      |                      |
| Left       | AF posterior segment | 29   | .74      | .033 | .83  | 2.71        | .033              | .102                 | .990                 |
|            |                      | 30   | .74      | .033 | .84  | 3.04        | .033              | .102                 | .990                 |
|            |                      | 31   | .74      | .033 | .85  | 3.27        | .033              | .102                 | .990                 |
|            |                      | 32   | .74      | .034 | .86  | 3.42        | .034              | .102                 | .917                 |
|            |                      | 33   | .74      | .035 | .87  | 3.56        | .035              | .109                 | .693                 |
|            |                      | 34   | .74      | .035 | .88  | 3.72        | .035              | .115                 | .540                 |
|            |                      | 35   | .74      | .035 | .88  | 3.89        | .035              | .119                 | .429                 |
|            |                      | 36   | .74      | .035 | .88  | 4.01        | .035              | .123                 | .347                 |
|            |                      | 37   | .74      | .035 | .89  | 4.05        | .035              | .130                 | .276                 |
|            |                      | 38   | .74      | .037 | .89  | 3.99        | .037              | .135                 | .230                 |
|            |                      | 39   | .74      | .038 | .89  | 3.89        | .038              | .147                 | .202                 |
|            |                      | 40   | .74      | .039 | .89  | 3.80        | .039              | .157                 | .185                 |
|            |                      | 41   | .74      | .040 | .89  | 3.73        | .040              | .171                 | .172                 |
|            |                      | 42   | .74      | .041 | .89  | 3.68        | .041              | .192                 | .158                 |
|            |                      | 43   | .74      | .041 | .89  | 3.61        | .041              | .215                 | .156                 |
|            |                      | 44   | .74      | .041 | .89  | 3.53        | .041              | .231                 | .156                 |
|            |                      | 45   | .74      | .042 | .89  | 3.45        | .042              | .254                 | .156                 |
|            |                      | 46   | .74      | .042 | .89  | 3.38        | .042              | .260                 | .156                 |
|            |                      | 47   | .74      | .042 | .88  | 3.32        | .042              | .266                 | .156                 |
|            |                      | 48   | .74      | .042 | .88  | 3.27        | .042              | .261                 | .156                 |
|            |                      | 49   | .74      | .042 | .88  | 3.22        | .042              | .257                 | .156                 |
|            |                      | 50   | .74      | .042 | .88  | 3.19        | .042              | .231                 | .158                 |
|            |                      | 51   | .74      | .041 | .88  | 3.16        | .041              | .207                 | .172                 |
|            |                      | 52   | .74      | .041 | .87  | 3.14        | .041              | .171                 | .180                 |
|            |                      | 53   | .74      | .040 | .87  | 3.13        | .040              | .152                 | .185                 |
|            |                      | 54   | .74      | .040 | .87  | 3.12        | .040              | .135                 | .202                 |
|            |                      | 55   | .74      | .039 | .86  | 3.11        | .039              | .121                 | .230                 |
|            |                      | 56   | .74      | .038 | .86  | 3.06        | .038              | .112                 | .276                 |
|            |                      | 57   | .74      | .038 | .85  | 2.97        | .038              | .109                 | .369                 |
|            |                      | 58   | .74      | .039 | .85  | 2.83        | .039              | .102                 | .512                 |
|            |                      | 59   | .74      | .039 | .84  | 2.69        | .039              | .102                 | .693                 |
| 63         | .74                  | .036 | .83      | 2.62 | .048 | .102        | .990              |                      |                      |
| 64         | .74                  | .034 | .83      | 2.74 | .042 | .102        | .990              |                      |                      |
| 65         | .74                  | .031 | .83      | 2.89 | .033 | .102        | .990              |                      |                      |
| 66         | .74                  | .029 | .83      | 3.03 | .026 | .102        | .990              |                      |                      |
| 67         | .74                  | .028 | .83      | 3.07 | .026 | .109        | .990              |                      |                      |
| 68         | .74                  | .027 | .82      | 2.93 | .030 | .119        | .990              |                      |                      |
| 69         | .74                  | .028 | .82      | 2.64 | .047 | .135        | .990              |                      |                      |
| Right      | Uncinate fasciculus  | 5    | .83      | .036 | .94  | 2.96        | .037              | .751                 | .229                 |
|            |                      | 6    | .83      | .036 | .94  | 3.10        | .033              | .626                 | .229                 |
|            |                      | 7    | .83      | .038 | .95  | 3.21        | .029              | .533                 | .229                 |
|            |                      | 8    | .83      | .039 | .96  | 3.31        | .029              | .459                 | .229                 |
|            |                      | 9    | .82      | .040 | .96  | 3.33        | .029              | .365                 | .229                 |
|            |                      | 10   | .82      | .041 | .96  | 3.26        | .029              | .361                 | .229                 |
|            |                      | 11   | .82      | .043 | .96  | 3.04        | .035              | .417                 | .229                 |
|            |                      | 83   | .74      | .038 | .85  | 2.88        | .041              | <b>.034</b>          | .551                 |
|            |                      | 84   | .73      | .039 | .86  | 3.20        | .029              | <b>.028</b>          | .464                 |
|            |                      | 85   | .73      | .040 | .87  | 3.45        | .027              | <b>.028</b>          | .425                 |
|            |                      | 86   | .73      | .041 | .89  | 3.67        | .021              | <b>.028</b>          | .328                 |
|            |                      | 87   | .73      | .041 | .90  | 3.87        | .017              | <b>.028</b>          | .272                 |
|            |                      | 88   | .73      | .041 | .91  | 4.06        | .015              | <b>.028</b>          | .245                 |
|            |                      | 89   | .73      | .041 | .91  | 4.24        | .015              | <b>.028</b>          | .229                 |
|            |                      | 90   | .73      | .040 | .91  | 4.33        | .015              | <b>.028</b>          | .229                 |
| 91         | .73                  | .040 | .91      | 4.32 | .015 | <b>.028</b> | .229              |                      |                      |
| 92         | .74                  | .039 | .90      | 4.20 | .015 | <b>.028</b> | .244              |                      |                      |

|       |              |     |     |      |     |      |      |             |      |
|-------|--------------|-----|-----|------|-----|------|------|-------------|------|
|       |              | 93  | .74 | .037 | .89 | 4.01 | .015 | <b>.028</b> | .272 |
|       |              | 94  | .74 | .036 | .88 | 3.81 | .018 | <b>.034</b> | .328 |
|       |              | 95  | .74 | .034 | .87 | 3.56 | .024 | <b>.043</b> | .435 |
|       |              | 96  | .74 | .033 | .85 | 3.27 | .029 | .053        | .543 |
|       |              | 97  | .74 | .032 | .84 | 3.03 | .035 | .055        | .720 |
|       |              | 98  | .74 | .030 | .83 | 2.97 | .037 | .055        | .811 |
|       |              | 99  | .74 | .027 | .83 | 3.11 | .033 | .055        | .811 |
|       |              | 100 | .74 | .025 | .83 | 3.27 | .029 | .051        | .811 |
|       | Inferior     | 35  | .81 | .040 | .97 | 3.81 | .047 | .899        | .274 |
| Right | Longitudinal | 36  | .82 | .038 | .98 | 4.07 | .047 | .899        | .274 |
|       | fasciculus   | 37  | .82 | .037 | .96 | 3.92 | .047 | .899        | .274 |

AF: arcuate fasciculus. AD and RD nodes that significantly differed between backward speakers and controls ( $p < .05$ , FDR-corrected) are highlighted in bold.

**Table S10.** Seed-to-voxel functional connectivity results based on resting-state data from Backward speaker 1.

| Seed location<br>(coordinates)             | Clusters MNI<br>coordinates |          |          | Cluster<br>size | Hemisphere                   | Anatomical label                                                            | Minimum cluster size<br><i>FDR</i> -corrected<br>[ $t(13) = 4.22$ ] |
|--------------------------------------------|-----------------------------|----------|----------|-----------------|------------------------------|-----------------------------------------------------------------------------|---------------------------------------------------------------------|
|                                            | <i>x</i>                    | <i>y</i> | <i>z</i> |                 |                              |                                                                             |                                                                     |
| Left inferior frontal<br>gyrus<br>-50 29 9 | 54                          | -2       | 8        | 461             | Right                        | (Pre)central operculum<br>Insula                                            | 262                                                                 |
|                                            | 58                          | -60      | -10      | 369             | Right                        | Heschl's gyrus<br>Lateral occipital<br>Inferior temporal<br>Middle temporal |                                                                     |
|                                            | 58                          | -30      | 26       | 262             | Right                        | Parietal operculum<br>Supramarginal<br>Postcentral                          |                                                                     |
| Right inferior frontal<br>gyrus<br>52 28 8 | -20                         | -52      | 62       | 372             | Left                         | Lateral occipital<br>Superior parietal                                      | 166                                                                 |
|                                            | 50                          | -54      | -2       | 342             | Right                        | Inferior temporal<br>Middle temporal                                        |                                                                     |
|                                            | -60                         | -24      | 44       | 313             | Left                         | Postcentral<br>Supramarginal                                                |                                                                     |
|                                            | 0                           | 20       | 28       | 302             | Right/left                   | Anterior Cingulate                                                          |                                                                     |
|                                            | 8                           | -54      | 64       | 246             | Right                        | Superior parietal                                                           |                                                                     |
|                                            | -26                         | 50       | -12      | 238             | Left                         | Frontal pole                                                                |                                                                     |
|                                            | 32                          | 60       | -4       | 228             | Right                        | Frontal pole                                                                |                                                                     |
|                                            | -6                          | -72      | 38       | 173             | Right/left                   | Precuneous                                                                  |                                                                     |
| 38                                         | -36                         | 52       | 166      | Right           | Postcentral<br>Supramarginal |                                                                             |                                                                     |
| Left insular cortex<br>-37 2 1             | 58                          | -62      | -10      | 501             | Right                        | Inferior temporal                                                           | 118                                                                 |
|                                            | 18                          | -98      | 10       | 411             | Right                        | Occipital pole                                                              |                                                                     |
|                                            | -12                         | -102     | -10      | 344             | Left                         | Occipital pole                                                              |                                                                     |
|                                            | 34                          | 64       | 06       | 182             | Right                        | Frontal pole                                                                |                                                                     |
|                                            | 52                          | 2        | 50       | 173             | Right                        | Precentral gyrus                                                            |                                                                     |
|                                            | 38                          | 44       | 38       | 171             | Right                        | Middle frontal gyrus                                                        |                                                                     |
|                                            | 38                          | -34      | 40       | 153             | Right                        | Postcentral                                                                 |                                                                     |
|                                            | 32                          | -84      | -20      | 131             | Right                        | Occipital<br>Fusiform                                                       |                                                                     |
|                                            | 14                          | -70      | 36       | 121             | Right                        | Precuneous                                                                  |                                                                     |
| 28                                         | -48                         | 68       | 118      | Right           | Superior parietal            |                                                                             |                                                                     |
| Right insular cortex<br>38 3 -1            | 58                          | -60      | -12      | 688             | Right                        | Inferior temporal                                                           | 201                                                                 |
|                                            | -38                         | 46       | -18      | 507             | Left                         | Frontal pole                                                                |                                                                     |
|                                            | 32                          | -88      | -20      | 376             | Right                        | Cerebellum Cru1                                                             |                                                                     |
|                                            | 44                          | 48       | -8       | 302             | Right                        | Frontal pole                                                                |                                                                     |
|                                            | -24                         | 52       | -6       | 213             | Left                         | Frontal pole                                                                |                                                                     |
| -26                                        | -92                         | -16      | 201      | Left            | Occipital pole               |                                                                             |                                                                     |
| Right supramarginal<br>gyrus<br>62 -35 32  | -10                         | -72      | 28       | 883             | Right/Left                   | Cuneus<br>Precuneus                                                         | 147                                                                 |
|                                            | -30                         | 56       | -6       | 549             | Left                         | Frontal pole                                                                |                                                                     |
|                                            | 26                          | 58       | -6       | 471             | Right                        | Frontal pole                                                                |                                                                     |
|                                            | 36                          | 34       | 46       | 365             | Right                        | Middle frontal                                                              |                                                                     |
|                                            | -36                         | 32       | 40       | 305             | Left                         | Middle frontal                                                              |                                                                     |
|                                            | 26                          | -50      | 68       | 153             | Right                        | Superior parietal                                                           |                                                                     |
| -54                                        | 26                          | 16       | 147      | Left            | Inferior frontal             |                                                                             |                                                                     |

**Table S11.** Seed-to-voxel functional connectivity results based on resting-state data from Backward speaker 2.

| Seed anatomical label<br>(coordinates) | Contrast | Clusters MNI<br>coordinates |          |          | Cluster<br>size | Hemisphere | Anatomical label            | Minimum<br>cluster size<br><i>FDR</i> -corrected<br>[ <i>t</i> (13) = 4.22] |
|----------------------------------------|----------|-----------------------------|----------|----------|-----------------|------------|-----------------------------|-----------------------------------------------------------------------------|
|                                        |          | <i>x</i>                    | <i>y</i> | <i>z</i> |                 |            |                             |                                                                             |
| Left insular cortex<br>-37 2 1         | +        | 38                          | -92      | -12      | 2567            | Right/Left | Occipital pole              | 188                                                                         |
|                                        |          |                             |          |          |                 | Right      | Lateral occipital           |                                                                             |
|                                        |          |                             |          |          |                 | Right      | Cuneus                      |                                                                             |
|                                        |          | -62                         | -20      | 4        | 188             | Left       | Inferior temporal           |                                                                             |
|                                        |          |                             |          |          |                 | Right      | Fusiform                    |                                                                             |
|                                        |          |                             |          |          |                 | Left       | Posterior Superior temporal |                                                                             |
|                                        | -        | -38                         | -50      | -56      | 223             | Left       | Cerebellum                  | 188                                                                         |
| Right insular cortex<br>38 3 -1        | +        | -2                          | -72      | 18       | 810             | Right/Left | Cuneus                      | 165                                                                         |
|                                        |          | 38                          | -84      | -6       | 165             | Right      | Lateral occipital           |                                                                             |
| Left supramarginal gyrus<br>-60 -39 31 | +        | -30                         | -98      | -6       | 182             | Left       | Occipital pole              | 182                                                                         |

### Supplementary references

1. Unsworth, N., Redick, T. S., Heitz, R. P., Broadway, J. M. & Engle, R. W. Complex working memory span tasks and higher-order cognition: A latent-variable analysis of the relationship between processing and storage. *Memory* **17**, 635–654 (2009).
2. Unsworth, N., Heitz, R. P., Schrock, J. C. & Engle, R. W. An automated version of the operation span task. *Behav. Res. Methods* **37**, 498–505 (2005).
3. Crawford, J. & Howell, D. C. Comparing an Individual's Test Score Against Norms Derived from Small Samples. *Clin. Neuropsychol.* **12**, 482–486 (1998).
4. Crawford, J. R., Garthwaite, P. H. & Porter, S. Point and interval estimates of effect sizes for the case-controls design in neuropsychology: Rationale, methods, implementations, and proposed reporting standards. *Cogn. Neuropsychol.* **27**, 245–260 (2010).
5. Crawford, J. R., Garthwaite, P. H. & Ryan, K. Comparing a single case to a control sample: Testing for neuropsychological deficits and dissociations in the presence of covariates. *Cortex* **47**, 1166–1178 (2011).
